# Supplementary material for: A dual-sensing strategy for the early diagnosis of urinary tract infections via detecting biofilm cellulose using aromatic amino acid-capped Au and Ag nanoparticles
Source: Royal Society of Chemistry journal article supplement (doi:10.1039/d4tb00902a), 2024-01-01

**Dual sensing strategy for early diagnosis of urinary tract infection using  
aromatic amino acid capped Au and Ag nanoparticles for the detection of  
biofilm cellulose**

**Supporting Information**

**Kavi Bharathi Ramaiah,<sup>1,3,4</sup> Indhu Suresh<sup>1,2</sup>, Srinandan C. S.<sup>1,3,4</sup>, Sai Subramanian N**

**<sup>1,3,4,\*</sup>,**

**and John Bosco Balaguru Rayappan<sup>1,2,\*</sup>**

*<sup>1</sup>Centre for Nanotechnology & Advanced Biomaterials (CeNTAB), SASTRA Deemed  
University, Thanjavur, 613401, Tamil Nadu, India*

*<sup>2</sup>School of Electrical and Electronics Engineering, SASTRA Deemed University, Thanjavur,  
613401, Tamil Nadu, India*

*<sup>3</sup>School of Chemical and Biotechnology, SASTRA Deemed University, Thanjavur 613 401,  
Tamil Nadu, India*

*<sup>4</sup>Biofilm Biology Lab & Antimicrobial Resistance Lab, Centre for Research in Infectious  
Diseases, SASTRA Deemed University, Thanjavur 613 401, Tamil Nadu, India*

**Fig. S1** AFM micrographs of the synthesized nanoparticles (a, d) 5, (b, e) 1, (c, f) 3 mM Tyr-capped Ag NPs, (g, j) AuNPs, (h, k) chitosan AuNPs (i, l) 3 mM Tyr-capped Au NPs, (a, b, c, g, h, i) 2D images, (d, e, f, j, k, l) 3D images.

**Fig. S2** Optimization of the loading volume of Tyr-capped Ag NPs (Inset: CV response for different loading masses at  $50 \text{ mV s}^{-1}$ ).

**Fig. S3** (a) Linear plot of log current vs log scan rate over the scan rate range of  $10 - 90 \text{ mV s}^{-1}$  (Inset: CV recorded for  $65 \text{ }\mu\text{g/mL}$  of cellulose for varying scan rates from  $10$  to  $90 \text{ mV s}^{-1}$ ), and (b) pH effect on the current characteristics for  $65 \text{ }\mu\text{g/mL}$  cellulose.

**Fig. S4** (a) Repeatability study of the sensor in the presence of  $65 \text{ }\mu\text{g/mL}$  of cellulose, (b) Reproducibility of the sensor in the presence of  $65 \text{ }\mu\text{g/mL}$  of cellulose.

**Fig. S1.**

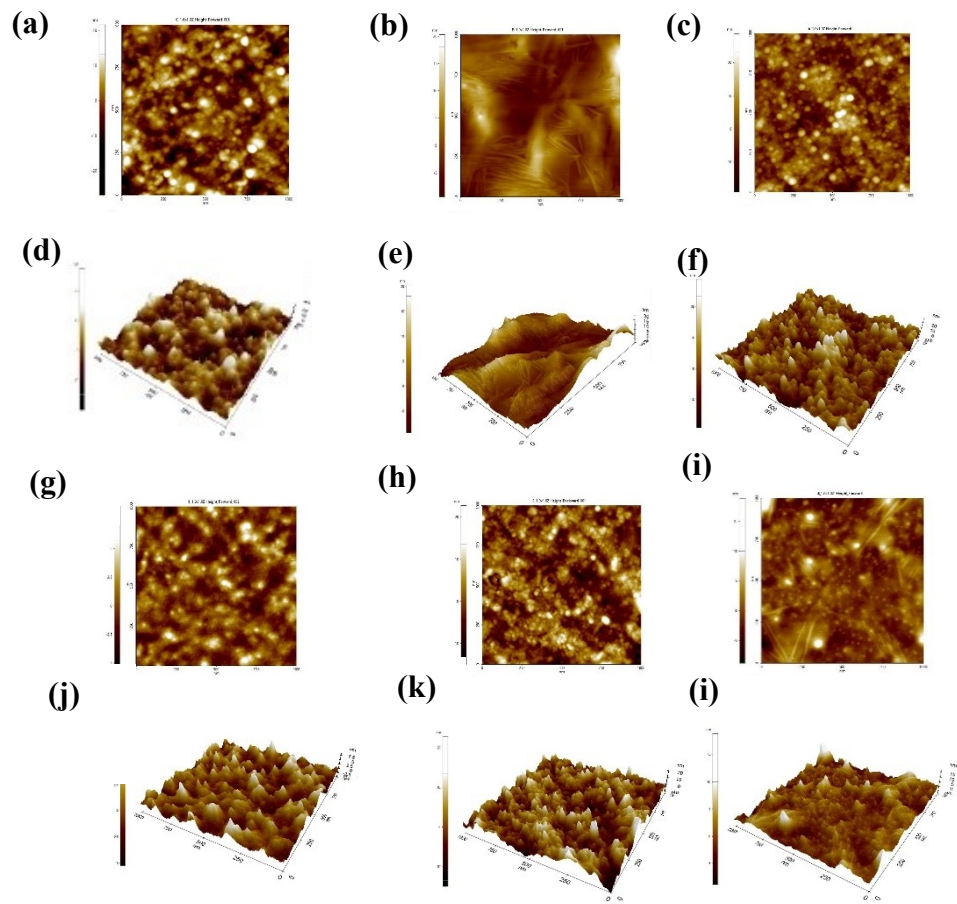

Fig. S2.

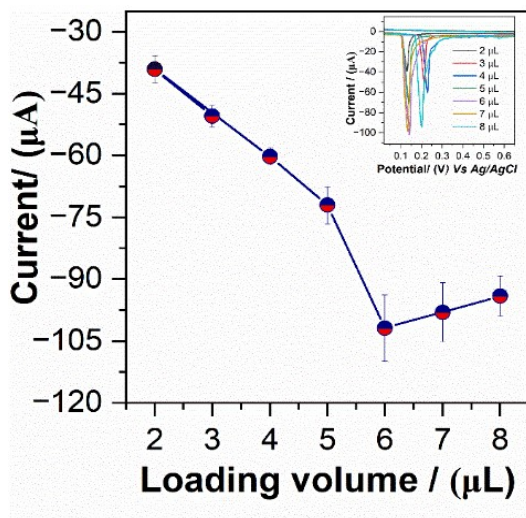

Fig. S3.

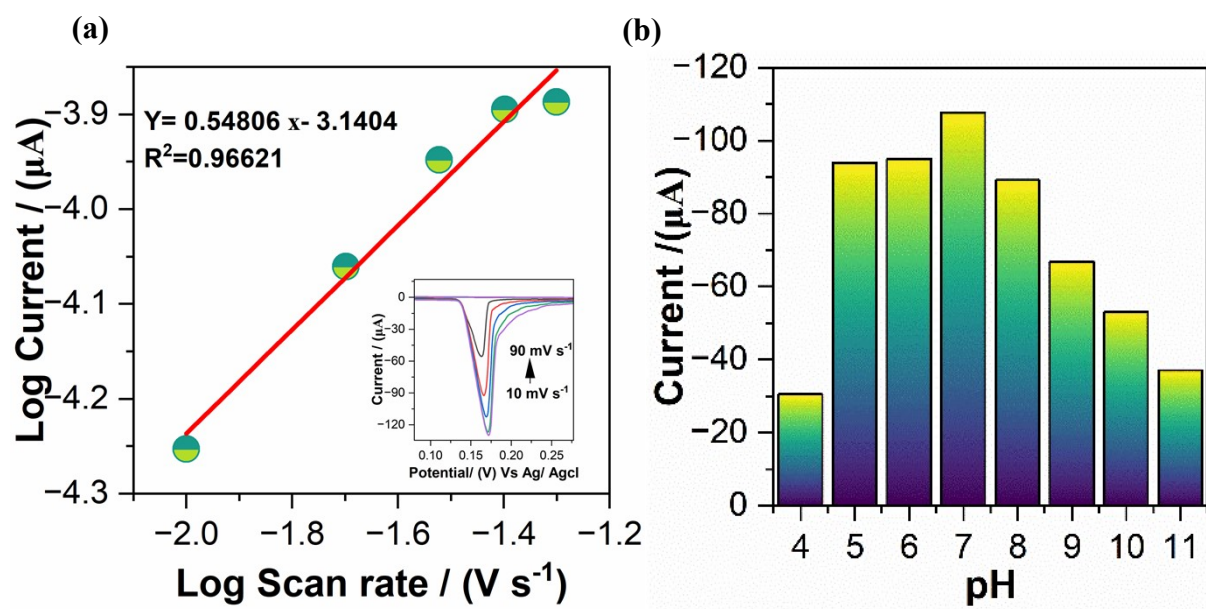

Fig. S4.

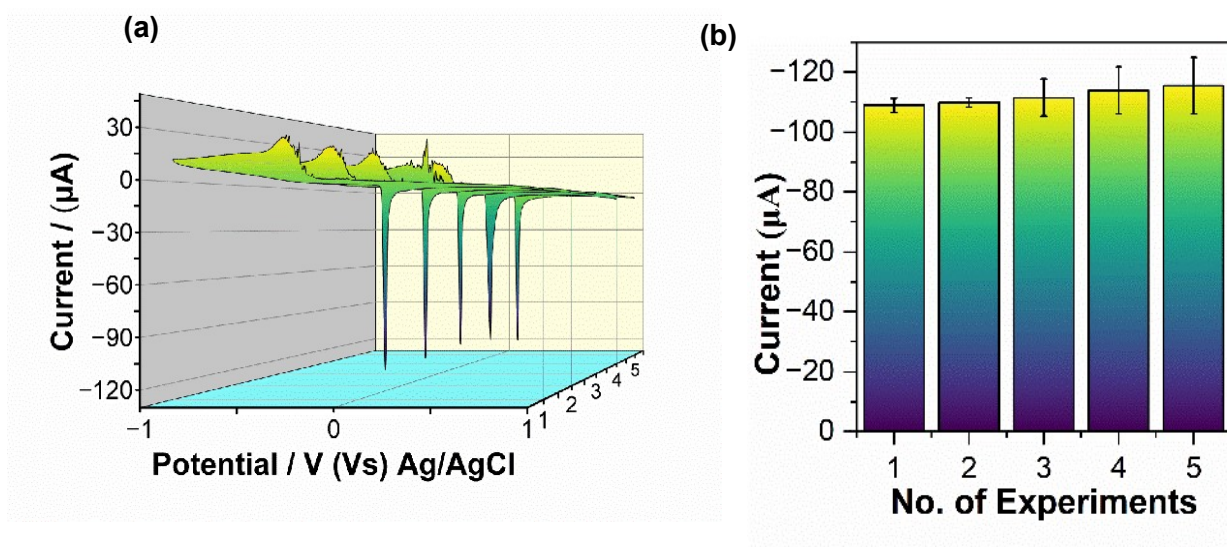

Supplement: d4tb00902a1.pdf [file d4tb00902a1.pdf]
